# Supplementary material for: Cognitive Deficits and White Matter Alterations in Highly Trained Scuba Divers
Source: PubMed Central journal article supplement (PMC6817599; doi:10.3389/fpsyg.2019.02376), 2019-10-22
Supplement: Table_2.pdf [file Table_2.pdf]

| Dunn's multiple comparisons test | Mean rank diff, | Summary |
|----------------------------------|-----------------|---------|
| SCC vs. GCC                      | 390,9           | ****    |
| SCC vs. CR r                     | 164,6           | ***     |
| SCC vs. CR l                     | 168,3           | ****    |
| SCC vs. CT r                     | 117,7           | *       |
| SCC vs. CT l                     | 123,9           | *       |
| SCC vs. FL r                     | 412,7           | ****    |
| SCC vs. FL l                     | 419,7           | ****    |
| SCC vs. TL r                     | 295,1           | ****    |
| SCC vs. TL l                     | 303,4           | ****    |
| SCC vs. PL r                     | 226,5           | ****    |
| SCC vs. PL l                     | 233,0           | ****    |
| SCC vs. OL r                     | 112,4           | ns      |
| SCC vs. OL l                     | 115,5           | ns      |
| GCC vs. CR r                     | -226,3          | ****    |
| GCC vs. CR l                     | -222,6          | ****    |
| GCC vs. CT r                     | -273,2          | ****    |
| GCC vs. CT l                     | -267,1          | ****    |
| GCC vs. FL r                     | 21,77           | ns      |
| GCC vs. FL l                     | 28,76           | ns      |
| GCC vs. TL r                     | -95,87          | ns      |
| GCC vs. TL l                     | -87,50          | ns      |
| GCC vs. PL r                     | -164,4          | ***     |
| GCC vs. PL l                     | -158,0          | ***     |
| GCC vs. OL r                     | -278,6          | ****    |
| GCC vs. OL l                     | -275,4          | ****    |
| CR r vs. CR l                    | 3,700           | ns      |
| CR r vs. CT r                    | -46,93          | ns      |
| CR r vs. CT l                    | -40,74          | ns      |
| CR r vs. FL r                    | 248,1           | ****    |
| CR r vs. FL l                    | 255,1           | ****    |
| CR r vs. TL r                    | 130,4           | *       |
| CR r vs. TL l                    | 138,8           | **      |
| CR r vs. PL r                    | 61,90           | ns      |
| CR r vs. PL l                    | 68,33           | ns      |
| CR r vs. OL r                    | -52,27          | ns      |
| CR r vs. OL l                    | -49,09          | ns      |
| CR l vs. CT r                    | -50,63          | ns      |
| CR l vs. CT l                    | -44,44          | ns      |
| CR l vs. FL r                    | 244,4           | ****    |
| CR l vs. FL l                    | 251,4           | ****    |
| CR l vs. TL r                    | 126,7           | *       |
| CR l vs. TL l                    | 135,1           | **      |
| CR l vs. PL r                    | 58,20           | ns      |
| CR l vs. PL l                    | 64,63           | ns      |
| CR l vs. OL r                    | -55,97          | ns      |

|               |        |      |
|---------------|--------|------|
| CR l vs. OL l | -52,79 | ns   |
| CT r vs. CT l | 6,186  | ns   |
| CT r vs. FL r | 295,0  | **** |
| CT r vs. FL l | 302,0  | **** |
| CT r vs. TL r | 177,4  | **** |
| CT r vs. TL l | 185,7  | **** |
| CT r vs. PL r | 108,8  | ns   |
| CT r vs. PL l | 115,3  | ns   |
| CT r vs. OL r | -5,343 | ns   |
| CT r vs. OL l | -2,157 | ns   |
| CT l vs. FL r | 288,8  | **** |
| CT l vs. FL l | 295,8  | **** |
| CT l vs. TL r | 171,2  | **** |
| CT l vs. TL l | 179,6  | **** |
| CT l vs. PL r | 102,6  | ns   |
| CT l vs. PL l | 109,1  | ns   |
| CT l vs. OL r | -11,53 | ns   |
| CT l vs. OL l | -8,343 | ns   |
| FL r vs. FL l | 6,986  | ns   |
| FL r vs. TL r | -117,6 | *    |
| FL r vs. TL l | -109,3 | ns   |
| FL r vs. PL r | -186,2 | **** |
| FL r vs. PL l | -179,8 | **** |
| FL r vs. OL r | -300,4 | **** |
| FL r vs. OL l | -297,2 | **** |
| FL l vs. TL r | -124,6 | *    |
| FL l vs. TL l | -116,3 | ns   |
| FL l vs. PL r | -193,2 | **** |
| FL l vs. PL l | -186,7 | **** |
| FL l vs. OL r | -307,3 | **** |
| FL l vs. OL l | -304,2 | **** |
| TL r vs. TL l | 8,371  | ns   |
| TL r vs. PL r | -68,54 | ns   |
| TL r vs. PL l | -62,11 | ns   |
| TL r vs. OL r | -182,7 | **** |
| TL r vs. OL l | -179,5 | **** |
| TL l vs. PL r | -76,91 | ns   |
| TL l vs. PL l | -70,49 | ns   |
| TL l vs. OL r | -191,1 | **** |
| TL l vs. OL l | -187,9 | **** |
| PL r vs. PL l | 6,429  | ns   |
| PL r vs. OL r | -114,2 | ns   |
| PL r vs. OL l | -111,0 | ns   |
| PL l vs. OL r | -120,6 | *    |
| PL l vs. OL l | -117,4 | *    |
| OL r vs. OL l | 3,186  | ns   |

**Supplementary Table S1.** Results of post hoc Dunn's Multiple Comparison Test for the entire sample of scuba divers. Abbreviations: CR, corona radiata; CT, corticospinal tract; FL, frontal lobe; GCC, genu of corpus callosum; l, left; ns, not significant; OL, occipital lobe; PL, parietal lobe; r, right; SCC, splenium of corpus callosum; TL, temporal lobe. \*\*\*\*,  $p < 0.0001$ ; \*\*\*,  $p < 0.001$ ; \*\*,  $p < 0.01$ ; \*,  $p < 0.05$ .
